# Supplementary material
Source: Springer Nature journal article supplement (https://www.springermedizin.de/resource/supplementary/12937_2010_307_MOESM9_ESM.pdf/25654834)

# Location of Hunger

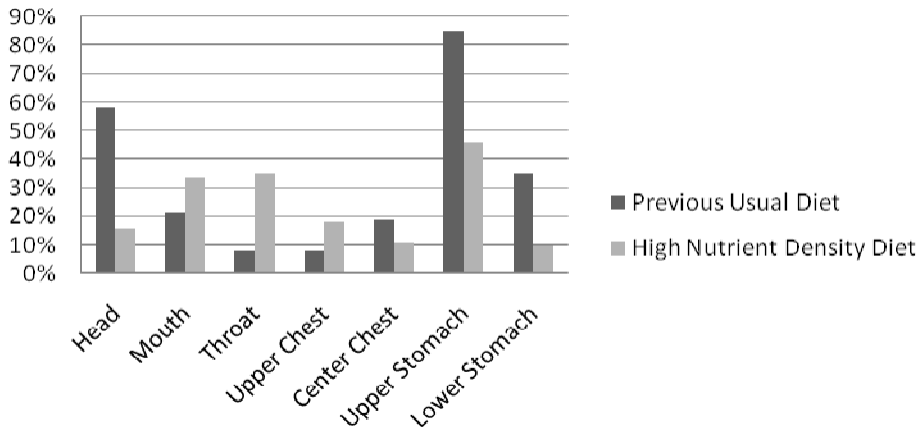

Supplement: MOESM9 [file 25654834]
